# Supplementary material for: Soft tissue manipulation enhances recovery of muscle mass in a disuse model of sarcopenia
Source: publisher site journal article supplement (doi:10.1515/jom-2024-0247), 2025-03-12
Supplement: Supplementary file 1 [file j_jom-2024-0247_suppl_001.docx]

**Supplemental Figure Legend**

**Supplemental Figure 1.** Mass of treated (A-B) and contralateral (C-D) gastrocnemii immediately after sacrifice (A, C) or after 12 days of drying (B, D) from weight-bearing controls (Control) or animals subjected to hindlimb suspension then immediately sacrificed (HLS), permitted eight days of re-ambulation (Re-A), or re-ambulation plus instrument-assisted soft tissue manipulation (Re-A+IASTM). Data are mean ± SEM for n=5 for Control, n=7 for HLS, n=7 Re-A and n=8 Re-A+IASTM. Data were determined to be normally distributed by Shapiro-Wilk test. * indicates p<0.05, ** indicates p<0.01, and *** indicates p<0.001 by one-way ANOVA with Tukey’s correction.
